# Supplementary material for: ZnSeTe quantum dots modified with zinc chloride toward bright trap-state emission
Source: Royal Society of Chemistry journal article supplement (doi:10.1039/d4cp01109k), 2024-01-01
Supplement: d4cp01109k1.pdf [file d4cp01109k1.pdf]

Supplementary Information

**ZnSeTe quantum dots modified with zinc chloride for bright white light-emitting diodes**

Zhe-Yong Chen<sup>a</sup>, Xue Ren<sup>a</sup>, Hui-Ling Hu<sup>a</sup>, Meng Liu<sup>a</sup>, Yi Liu<sup>a,b</sup> and Feng-Lei Jiang<sup>\*,a</sup>

<sup>a</sup> Sauvage Center for Molecular Sciences, College of Chemistry and Molecular Sciences, Wuhan University, Wuhan 430072, P. R. China

<sup>b</sup> State Key Laboratory of Separation Membranes and Membrane Processes, School of Chemistry, Tiangong University, Tianjin 300387, P. R. China

\*Corresponding Author. E-mail: fljiang@whu.edu.cn. Tel: +86-27-68756667.

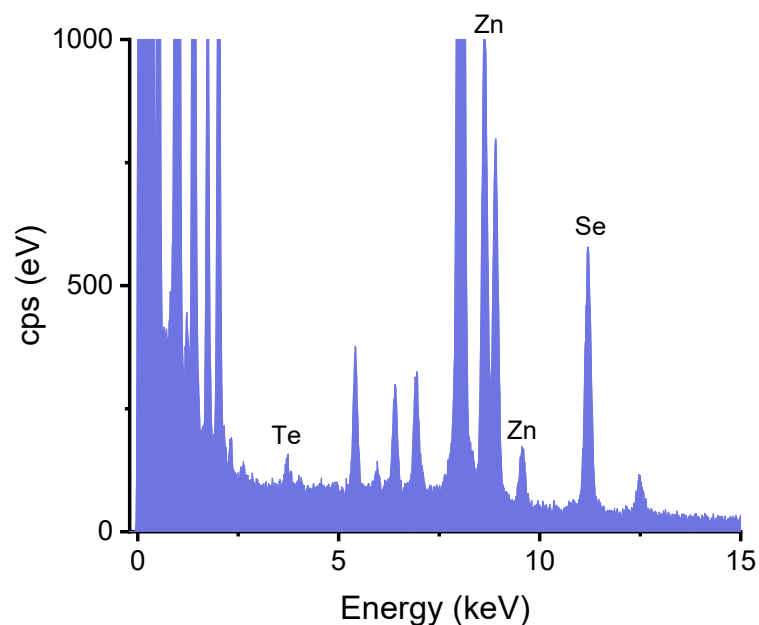

**Fig. S1.** EDS data of ZnSeTe core.

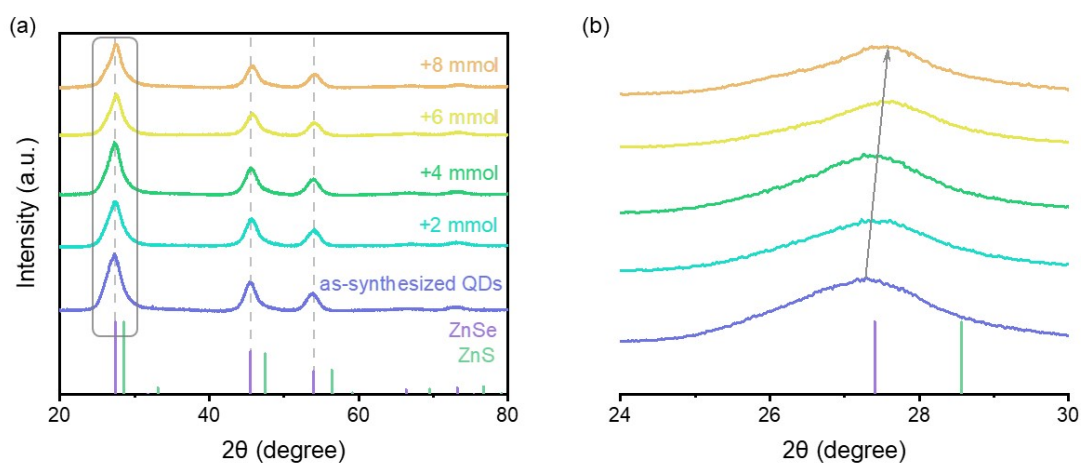

**Fig. S2.** (a) XRD patterns of the as-synthesized ZnSeTe/ZnSe/ZnSeS/ZnS QDs and ZnSeTe:ZnCl<sub>2</sub>/ZnSe/ZnSeS/ZnS QDs modified with 2 mmol, 4 mmol, 6 mmol and 8 mmol ZnCl<sub>2</sub>. At the bottom are the standard PDF (Powder Diffraction File) cards for cubic sphalerite ZnSe (PDF No. 01-070-0777) and ZnS (PDF No. 98-065-1457). (b) A magnified view of the QDs in the diffraction angle range of 24-30°, corresponding to the diffraction peak of the (111) crystal plane.

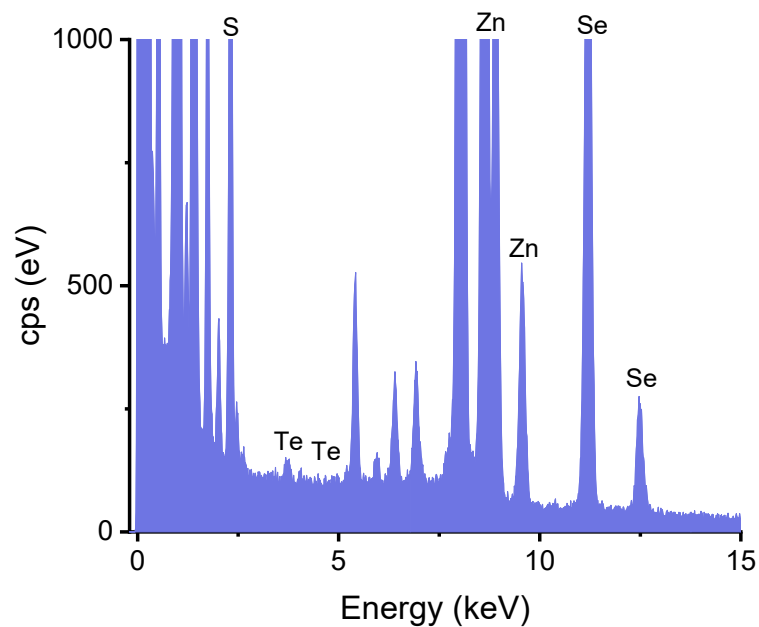

**Fig. S3.** EDS data of the as-synthesized ZnSeTe/ZnSe/ZnSeS/ZnS QDs.

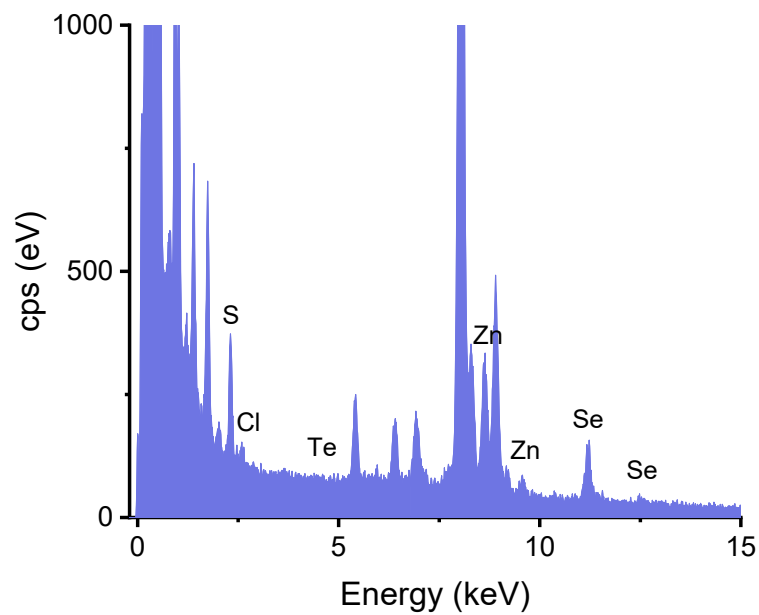

**Fig. S4.** EDS data of ZnSeTe:ZnCl<sub>2</sub>/ZnSe/ZnSeS/ZnS QDs modified with 2 mmol ZnCl<sub>2</sub>.

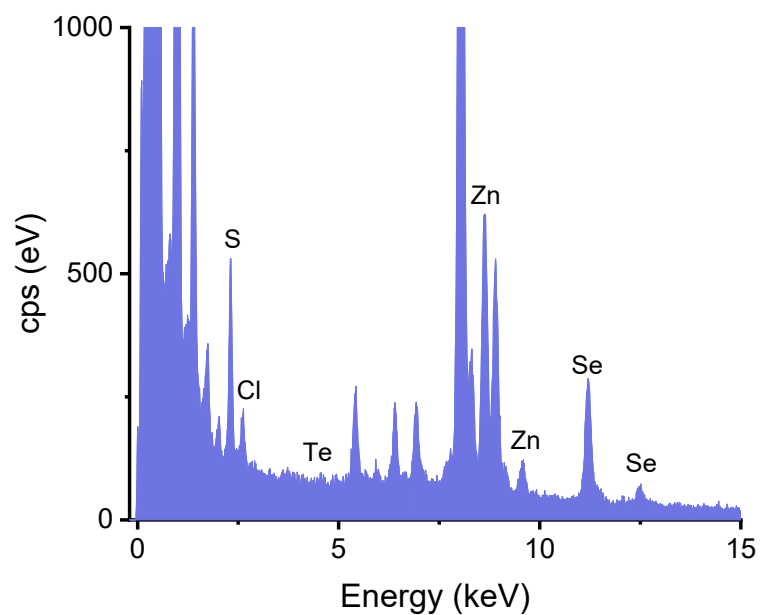

**Fig. S5.** EDS data of ZnSeTe:ZnCl<sub>2</sub>/ZnSe/ZnSeS/ZnS QDs modified with 4 mmol ZnCl<sub>2</sub>.

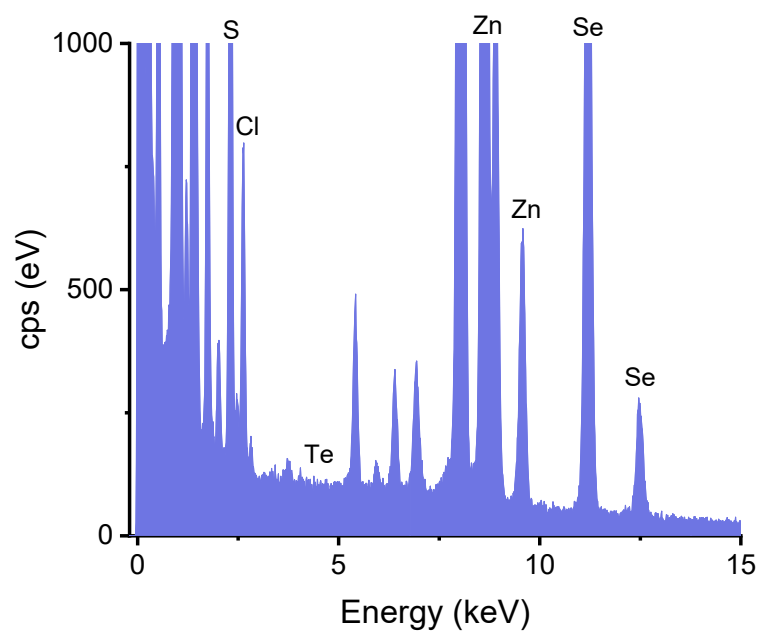

**Fig. S6.** EDS data of ZnSeTe:ZnCl<sub>2</sub>/ZnSe/ZnSeS/ZnS QDs modified with 6 mmol ZnCl<sub>2</sub>.

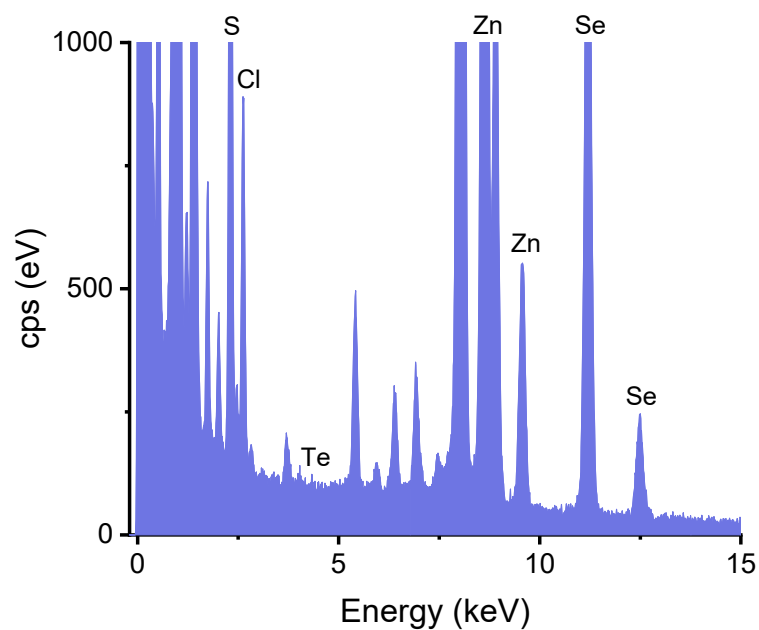

**Fig. S7.** EDS data of ZnSeTe:ZnCl<sub>2</sub>/ZnSe/ZnSeS/ZnS QDs modified with 8 mmol ZnCl<sub>2</sub>.

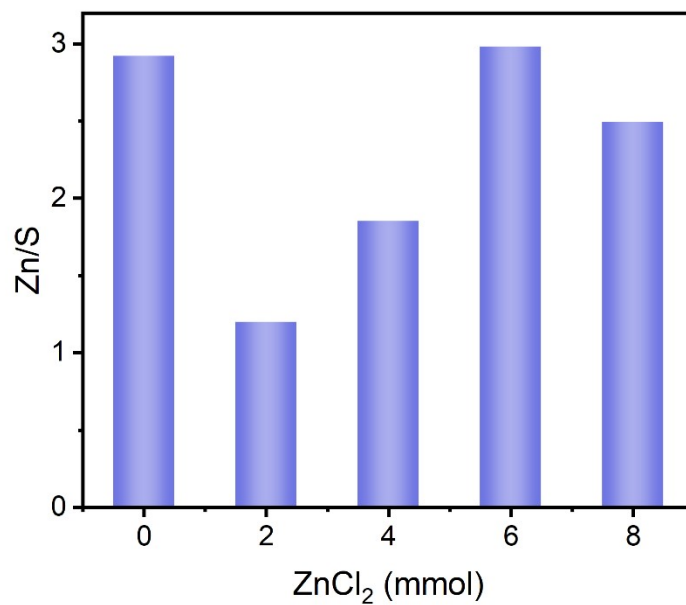

**Fig. S8.** Atomic ratio of Zn and S in ZnSeTe:ZnCl<sub>2</sub>/ZnSe/ZnSeS/ZnS QDs modified with various amount of ZnCl<sub>2</sub>.

**Table S1.** PL lifetimes of ZnSeTe/ZnSe/ZnSeS/ZnS QDs (Control) and ZnSeTe:ZnCl<sub>2</sub>/ZnSe/ZnSeS/ZnS QDs modified with 2, 4, 6 mmol ZnCl<sub>2</sub>.

| ZnCl <sub>2</sub><br>(mmol) | $\tau_1$ (ns) | $f_{B1}$ (%) | $\tau_2$ (ns) | $f_{B2}$ (%) | $\tau_3$ (ns) | $f_{B3}$ (%) | $\tau_{ave}$ (ns) |
|-----------------------------|---------------|--------------|---------------|--------------|---------------|--------------|-------------------|
| Control                     | -             | -            | 24            | 53.68        | 94            | 46.32        | 56                |
| 2                           | 12            | 8.13         | 128           | 31.01        | 1005          | 60.85        | 652               |
| 4                           | 10            | 8.36         | 131           | 24.92        | 995           | 66.72        | 697               |
| 6                           | 6             | 10.25        | 127           | 24.82        | 1018          | 64.92        | 693               |

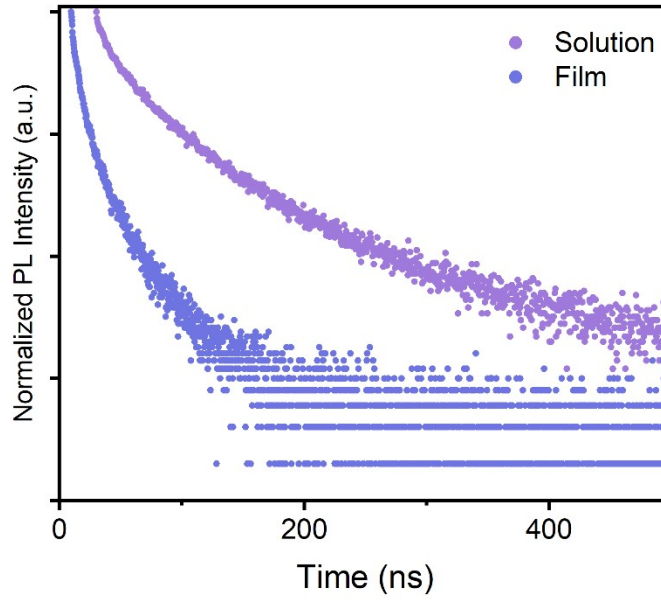

**Fig. S9.** TRPL decay curves of the as-synthesized ZnSeTe/ZnSe/ZnSeS/ZnS QDs in solution and film states.

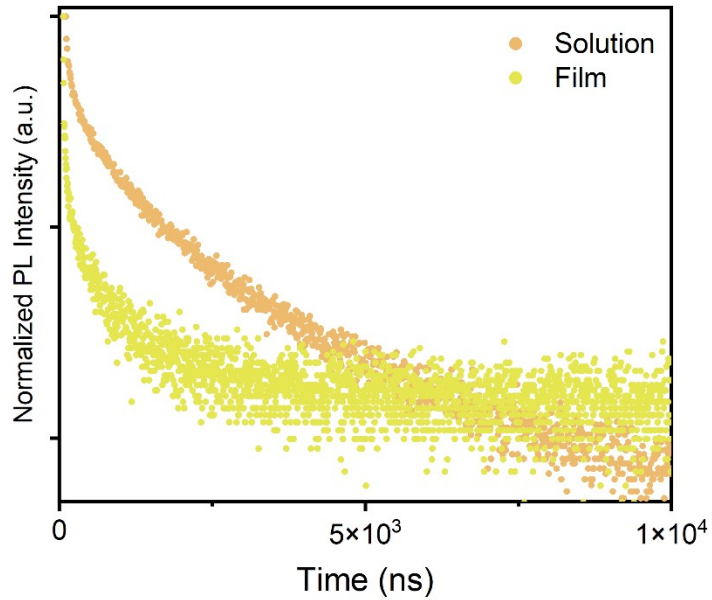

**Fig. S10.** TRPL decay curves of ZnSeTe:ZnCl<sub>2</sub>/ZnSe/ZnSeS/ZnS QDs in solution and film states.

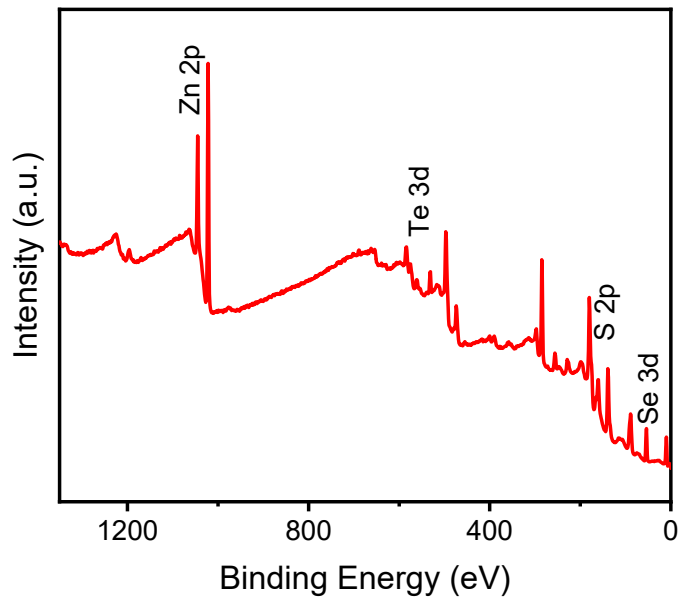

**Fig. S11.** XPS survey scan of the as-synthesized ZnSeTe/ZnSe/ZnSeS/ZnS QDs.

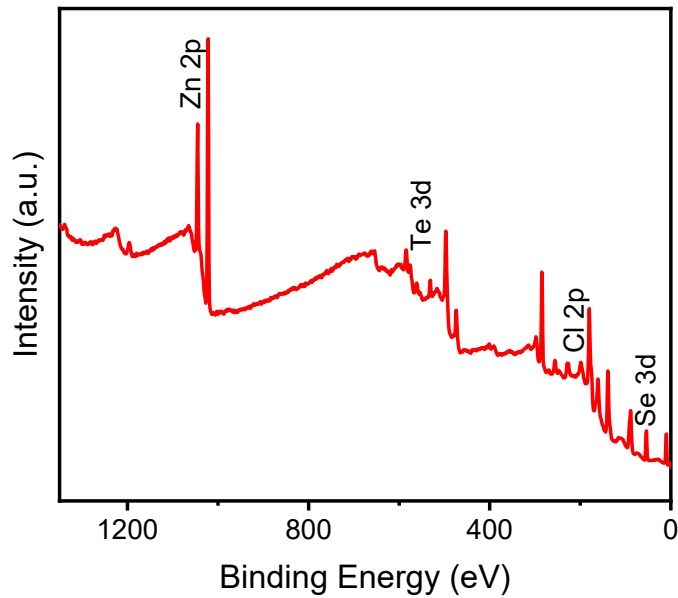

**Fig. S12.** XPS survey scan of ZnSeTe:ZnCl<sub>2</sub>/ZnSe/ZnSeS/ZnS QDs.

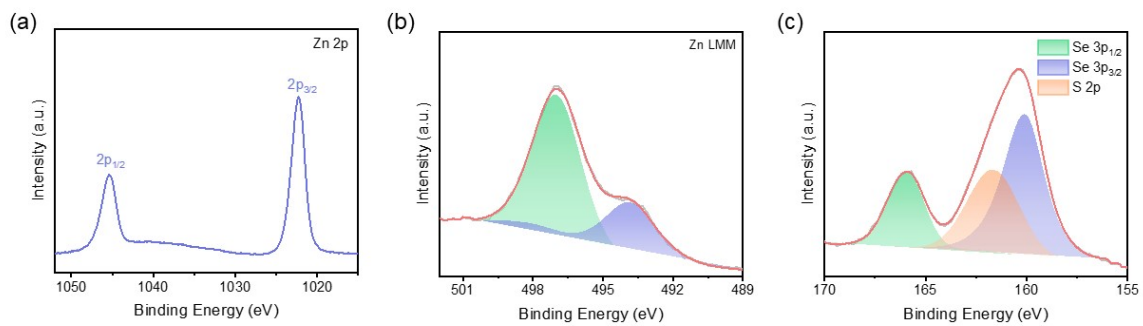

**Fig. S13.** XPS peaks of (a) Zn 2p, (b) Zn LMM, (c) Se 3p and S 2p orbitals in the as-synthesized ZnSeTe/ZnSe/ZnSeS/ZnS QDs.



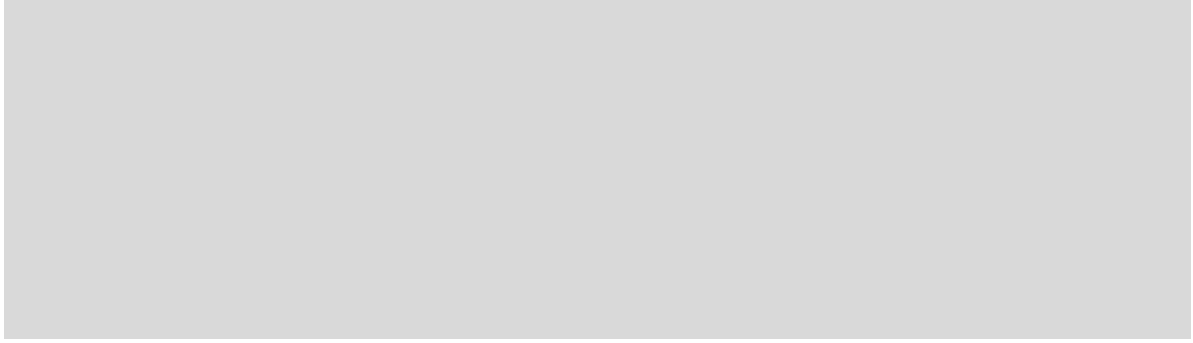

**Fig. S14.** XPS peaks of (a) Zn 2p, (b) Zn LMM, (c) Se 3p and S 2p orbitals in ZnSeTe:ZnCl<sub>2</sub>/ZnSe/ZnSeS/ZnS QDs.

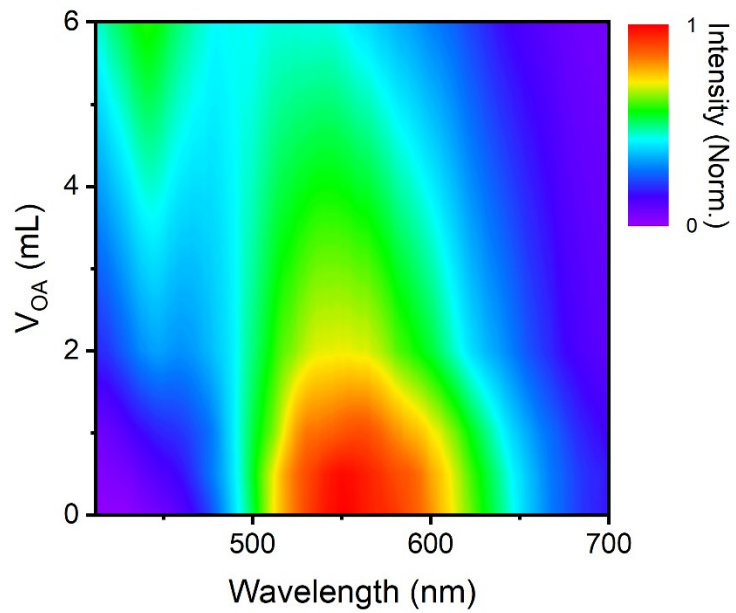

**Fig. S15.** PL spectra of the QD solution with different amounts of OA added.

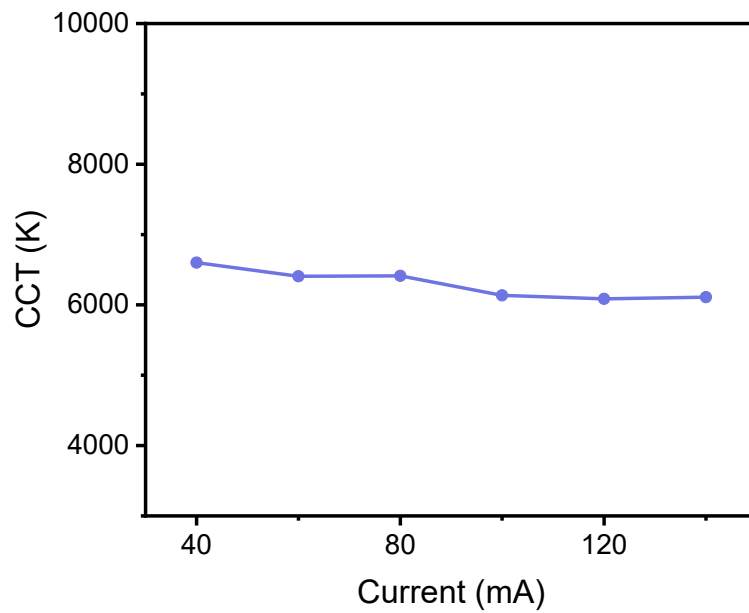

**Fig. S16.** Correlated color temperature of WLED at various currents.

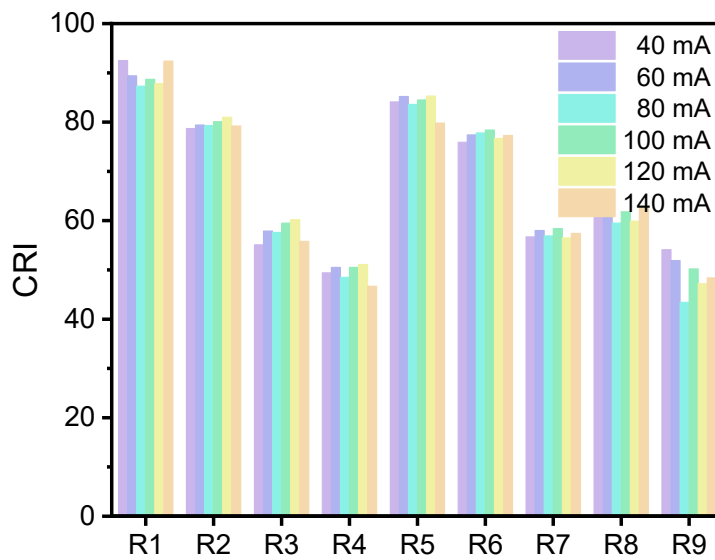

**Fig. S17.** Color rendering index values of WLED for R1-R9.
